# Supplementary material
Source: PubMed Central journal article supplement (PMC222904)
Supplement: 1471-2202-4-22-S1.pdf [file 1471-2202-4-22-S1.pdf]

## Targets - Activations

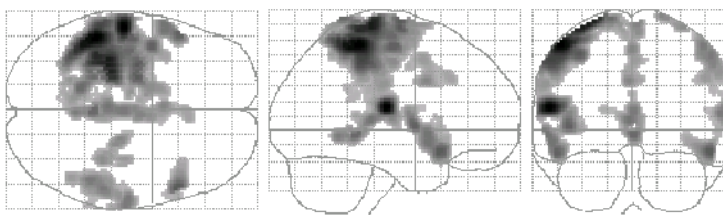

| Cluster Level |        | Voxel Level |       |         |          | MNI coordinates |     |     |      | Anatomy                         |                |
|---------------|--------|-------------|-------|---------|----------|-----------------|-----|-----|------|---------------------------------|----------------|
| p(cor)        | equivk | p(cor)      | T     | p(nc)   | Populat. | x               | y   | z   | Side | Anatomical site                 | BA             |
| < 1.0E-13     | 4881   | 2.2E-16     | 11.29 | 2.2E-16 | 55%      | -56             | -20 | 16  | L    | <i>Postcentral Gyrus</i>        | BA 40/43/4/3/2 |
|               |        | 2.2E-16     | 10.21 | 2.2E-16 | 55%      | -44             | -48 | 58  | L    | <i>Inferior Parietal Lobule</i> | BA 40          |
|               |        | 3.0E-03     | 5.40  | 3.8E-08 | 0.09     | -2              | 8   | 34  |      | <i>Anterior Cingulate Area</i>  | BA 24/32       |
| 5.19E-05      | 345    | 1.2E-07     | 7.14  | 6.8E-13 | 0.14     | 54              | 16  | -14 | R    | <i>Inferior Frontal Gyrus</i>   | BA 47          |
|               |        | 1.0E+00     | 3.20  | 6.9E-04 | 0.34     | 54              | 14  | 10  | R    | <i>Inferior Frontal Gyrus</i>   | BA 44          |
| 3.47E-08      | 686    | 3.5E-07     | 6.98  | 2.2E-12 | 55%      | -44             | 0   | 2   | L    | <i>Anterior Insula</i>          |                |
|               |        | 5.1E-05     | 6.16  | 4.6E-10 | 54%      | -54             | 18  | -8  | L    | <i>Inferior Frontal Gyrus</i>   | BA 47          |
| 5.02E-08      | 667    | 6.4E-05     | 6.12  | 6.0E-10 | 0.11     | -2              | -30 | 6   |      | <i>Thalamus (Pulvinar)</i>      |                |
|               |        | 1.5E-04     | 5.96  | 1.5E-09 | 0.09     | 0               | -18 | 12  |      | <i>Thalamus (Dorso-medial)</i>  |                |
| 9.29E-12      | 1153   | 1.4E-04     | 5.98  | 1.4E-09 | 0.37     | 62              | -16 | 12  | R    | <i>Postcentral Gyrus</i>        | BA 40/43/4/3/2 |
|               |        | 2.1E-04     | 5.91  | 2.1E-09 | 54%      | 48              | -42 | 58  | R    | <i>Inferior Parietal Lobule</i> | BA 40          |
|               |        | 9.9E-01     | 3.51  | 2.3E-04 | 0.09     | 66              | -42 | 22  | R    | <i>Supramarginal Gyrus</i>      | BA 40          |
| 1.13E-02      | 149    | 2.9E-03     | 5.39  | 4.0E-08 | 0.28     | 20              | -22 | 78  | R    | <i>Postcentral Gyrus</i>        | BA 3/2/1       |

## Targets - De-activations

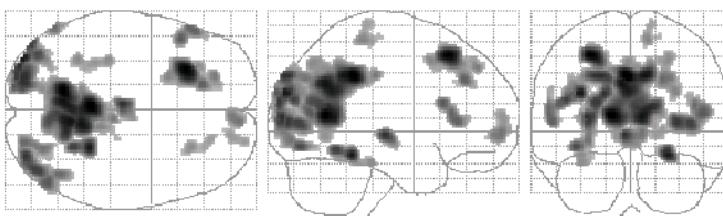

| Cluster Level |        | Voxel Level |         |         |          | MNI coordinates |     |     |      | Anatomy                          |        |
|---------------|--------|-------------|---------|---------|----------|-----------------|-----|-----|------|----------------------------------|--------|
| p(cor)        | equivk | p(cor)      | T       | p(nc)   | Populat. | x               | y   | z   | Side | Anatomical site                  | BA     |
| < 1.0E-13     | 5111   | 7.2E-06     | 6.49    | 5.7E-11 | 55%      | -2              | -40 | 38  |      | <i>Posterior cingulate Gyrus</i> | BA 31  |
|               |        | 8.9E-06     | 6.46    | 7.1E-11 | 54%      | -14             | -60 | 12  |      | <i>Precuneus</i>                 | BA 7   |
| 6.2E-09       | 777    | 1.4E-05     | 6.38    | 1.2E-10 | 54%      | -28             | 24  | 52  | L    | <i>Superior Frontal Sulcus</i>   | BA 8   |
| 2.2E-03       | 203    | 2.1E-04     | 5.90    | 2.2E-09 | 0.07     | 26              | -42 | -16 | R    | <i>Fusiform Gyrus</i>            | BA 20  |
| 4.5E-03       | 179    | 2.1E-03     | 5.46    | 2.7E-08 | 0.07     | -4              | -20 | -2  |      | <i>Thalamus</i>                  |        |
| 2.1E-08       | 711    | 3.1E-03     | 5.38    | 4.2E-08 | 0.06     | 32              | -86 | 6   | R    | <i>Middle Occipital Gyrus</i>    | BA 19  |
| 3.7E-03       | 185    | 5.1E-02     | 4.77    | 1.0E-06 | 0.05     | -48             | 20  | 20  | L    | <i>Inferior Frontal Gyrus</i>    | BA 44  |
| 1.5E-04       | 303    | 1.1E-01     | 4.57    | 2.6E-06 | 0.18     | 22              | -86 | 36  | R    | <i>Cuneus</i>                    | BA 19  |
| 5.3E-02       | 103    | 1.8E-01     | 4.45    | 4.7E-06 | 0.06     | -56             | -66 | 16  | L    | <i>Medial Temporal Gyrus</i>     | BA 39  |
|               |        | 9.9E-01     | 3.49    | 2.5E-04 | 0.06     | -56             | -66 | 26  | L    | <i>Superior Temporal Sulcus</i>  | BA 39  |
| 5.0E-04       | 256    | 2.5E-01     | 4.36    | 7.0E-06 | 0.18     | 8               | 60  | -2  | R    | <i>Superior Frontal Gyrus</i>    | BA 10  |
| 5.1E-02       | 104    | 5.9E-01     | 4.04    | 2.8E-05 | 0.09     | 12              | -34 | 62  | R    | <i>Central Sulcus</i>            | BA 3/4 |
| 2.3E-02       | 127    | 6.9E-01     | 3.97    | 3.8E-05 | 0.28     | -34             | -50 | -16 | L    | <i>Fusiform Gyrus</i>            | BA 37  |
| 8.2E-03       | 159    | 7.6E-01     | 3.90747 | 4.9E-05 | 0.12     | 26              | 28  | 48  | R    | <i>Superior Frontal Sulcus</i>   | BA 8   |

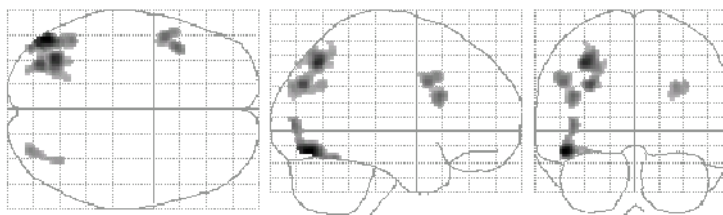

## Novels - Activations

| Cluster Level |        | Voxel Level |      |         |          | MNI coordinates |     |     |      | Anatomy                         |       |
|---------------|--------|-------------|------|---------|----------|-----------------|-----|-----|------|---------------------------------|-------|
| p(cor)        | equivk | p(cor)      | T    | p(nc)   | Populat. | x               | y   | z   | Side | Anatomical site                 | BA    |
| 1.1E-03       | 228    | 1.1E-03     | 5.59 | 1.3E-08 | 54%      | -48             | -74 | -14 | L    | <i>Middle Occipital Gyrus</i>   | BA 19 |
|               |        | 4.1E-01     | 4.19 | 1.5E-05 | 0.09     | -42             | -84 | 4   | L    | <i>Middle Occipital Gyrus</i>   | BA 19 |
| 1.7E-05       | 391    | 2.2E-02     | 4.97 | 3.7E-07 | 0.19     | -34             | -68 | 46  | L    | <i>Posterior Parietal</i>       | BA 7  |
| 3.7E-03       | 185    | 3.9E-01     | 4.21 | 1.4E-05 | 0.07     | -42             | 16  | 24  | L    | <i>Inferior Frontal Sulcus</i>  | BA 44 |
|               |        | 4.6E-01     | 4.14 | 1.8E-05 | 0.07     | -48             | 8   | 34  | L    | <i>Inferior Frontal Sulcus</i>  | BA 6  |
| 5.3E-02       | 103    | 8.7E-01     | 3.80 | 7.5E-05 | 0.18     | 28              | -84 | 30  | R    | <i>Superior Occipital Gyrus</i> | BA 19 |
